# Supplementary material for: Anticancer activity of large metalla-assemblies built from half-sandwich complexes
Source: Royal Society of Chemistry journal article supplement (doi:10.1039/c6ce00139d), 2016-01-01
Supplement: c6ce00139d1.pdf [file c6ce00139d1.pdf]

## Supplementary Information

### Anticancer activity of large metalla-assemblies built from half-sandwich complexes

Gajendra Gupta,<sup>a,b</sup> Gopi Suresh Oggu,<sup>c</sup> Narayana Nagesh,<sup>c</sup> Kiran Kumar Bokara<sup>c</sup> and Bruno Therrien<sup>\*a</sup>

<sup>a</sup> Institute of Chemistry, University of Neuchâtel, CH-2000 Neuchâtel, Switzerland

<sup>b</sup> Department of Energy and Chemical Engineering, Incheon National University, Incheon 406-772, Republic of Korea.

<sup>c</sup> CSIR-Centre for Cellular and Molecular Biology, Hyderabad-500007, India

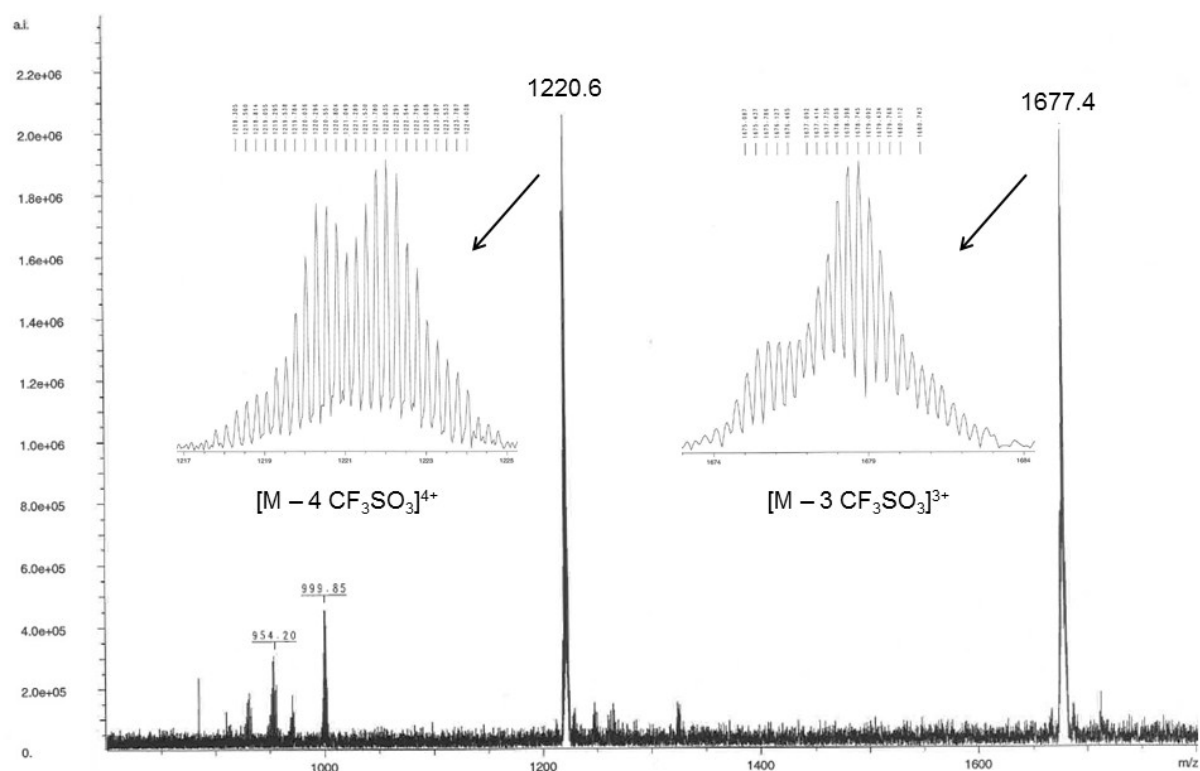

**Figure S1:** Electrospray ionization mass spectrum of  $[1][\text{CF}_3\text{SO}_3]_8$ .
